# Supplementary material for: Effect of Standardized Grape Powder Consumption on the Gut Microbiome of Healthy Subjects: A Pilot Study
Source: MDPI journal article supplement (doi:10.3390/nu13113965), 2021-11-06
Supplement: s1 [file s1]

**Supplementary Table S1:** Phytochemicals Analyzed in Freeze-Dried Preparation (value per kg grape powder)

| <b>Compounds</b>                                    | <b>Total</b> | <b>Individual</b>   |
|-----------------------------------------------------|--------------|---------------------|
| <b>Catechins</b>                                    | 17 mg/kg     |                     |
| Catechin                                            |              | 14.6 mg/kg +/- .718 |
| Epicatechin                                         |              | 2.43mg/kg +/- .12   |
| <b>Anthocyanins</b>                                 | 9.82 mg /kg  |                     |
| Peonidin                                            |              | 2.62 mg/kg +/- .152 |
| Cyanidin                                            |              | .24 mg/kg + /- .013 |
| Malvidin                                            |              | 6.96 +/- .298       |
| <b>Flavonoids</b>                                   |              |                     |
| Quercetin                                           |              | 1.58 mg/kg +/- .086 |
| <b>Flavonols</b>                                    |              |                     |
| Kaempferol                                          |              | .139 mg/kg +/- .018 |
| Isorhamnetin                                        |              | .145 mg/kg +/- .016 |
| <b>Stilbenes</b>                                    |              |                     |
| Resveratrol                                         |              | .33 mg/kg +/- .061  |
| <b>Total Polyphenols</b> in gallic acid equivalents |              | 354 mg/100g         |

**Supplementary Table S2:** Nutrient Analysis of Freeze-Dried Table Grape Powder (value per 100g of grape powder)

| <b>Nutrient</b>             | <b>Amount<br/>(per 100 g powder)</b> | <b>Units</b> |
|-----------------------------|--------------------------------------|--------------|
| Calories                    | 360                                  | kcal         |
| Total Fat, acid hydrolysis  | .87                                  | g            |
| Total Carbohydrate (sugars) | 82                                   | g            |
| Protein (N x 6.25)          | 3.7                                  | g            |
| Calcium                     | 58.7                                 | mg           |
| Iron                        | 1.78                                 | mg           |
| Sodium                      | 32.4                                 | mg           |
| Potassium                   | 1030                                 | mg           |
| Thiamin                     | .18                                  | mg           |
| Folic Acid                  | 15.5                                 | mcg          |
| Phosphorus                  | 100                                  | mg           |
| Magnesium                   | 36.8                                 | mg           |
| Zinc                        | .241                                 | mg           |
| Copper                      | .413                                 | mg           |
| Manganese                   | .457                                 | mg           |
| Moisture                    | 5.89                                 | g            |
| Ash                         | 3.3                                  | g            |
